# Supplementary material for: The next generation of scenarios for climate change research and assessment
Source: Springer Nature journal article supplement (doi:10.1038/nature08823), 2010-02-01
Supplement: 41586_2010_BFnature08823_MOESM311_ESM.pdf [file 41586_2010_BFnature08823_MOESM311_ESM.pdf]

## SUPPLEMENTARY INFORMATION

### Timeline of Some Notable Developments and International Applications of Scenarios in Climate Research

Note: This timeline highlights some notable developments in the creation and use of emissions and climate scenarios. The entries are illustrative of the overall course of model-based scenario development and application described in this Perspective and do not provide a comprehensive account of all major scenarios and significant studies or assessments which have employed them.

| Year  | Scenario Development                                                                                                                                | Notable Applications | Context and Institutional Developments                                                                                                                                                             |
|-------|-----------------------------------------------------------------------------------------------------------------------------------------------------|----------------------|----------------------------------------------------------------------------------------------------------------------------------------------------------------------------------------------------|
| 1896  |                                                                                                                                                     |                      | Arrhenius publishes initial quantification of temperature effects of rising CO <sub>2</sub> concentrations based on a “scenario” of global coal consumption. <sup>1</sup>                          |
| 1960  |                                                                                                                                                     |                      | Publication of first robust evidence that CO <sub>2</sub> is increasing in the global atmosphere, and faster than Arrhenius expected. <sup>2</sup>                                                 |
| 1967  | Climate sensitivity investigated using a radiative-convective model of the atmosphere. <sup>3</sup>                                                 |                      |                                                                                                                                                                                                    |
| 1969  | Coupled ocean-atmosphere GCM is developed with realistic Earth geography and oceanic and atmospheric processes. <sup>4</sup>                        |                      |                                                                                                                                                                                                    |
| 1970s | Predecessors of contemporary global scenarios used in “futures studies” exploring the long-term sustainability of natural resources. <sup>5-8</sup> |                      |                                                                                                                                                                                                    |
| 1979  |                                                                                                                                                     |                      | The First World Climate Conference recognizes climate change as a serious problem and calls on the world’s governments “to foresee and prevent potential man-made changes in climate that might be |

|       |                                                                                                                                                                                                                                                          |  |                                                                                                                                                                                                                                                                                                                       |
|-------|----------------------------------------------------------------------------------------------------------------------------------------------------------------------------------------------------------------------------------------------------------|--|-----------------------------------------------------------------------------------------------------------------------------------------------------------------------------------------------------------------------------------------------------------------------------------------------------------------------|
|       |                                                                                                                                                                                                                                                          |  | adverse to the well-being of humanity.”                                                                                                                                                                                                                                                                               |
| 1980s | Scenarios become mainstream in futures research and are applied to other issues such as oil scarcity; initial explorations of the implications of global energy needs for future CO <sub>2</sub> emissions, concentrations, and climate. <sup>9-11</sup> |  |                                                                                                                                                                                                                                                                                                                       |
| 1980  |                                                                                                                                                                                                                                                          |  | World Climate Research Program (WCRP) is established to determine the predictability of the climate and the impacts of human activities on the climate system. It plays a significant role in climate model development and coordination with the IPCC and the integrated assessment and impact research communities. |
| 1983  |                                                                                                                                                                                                                                                          |  | WMO/UNEP/ICSU conference at Villach, Austria, presents some of the earliest results of impact studies on agriculture and ecosystems using GCM-based climate scenarios. <sup>12</sup>                                                                                                                                  |
| 1985  |                                                                                                                                                                                                                                                          |  | A second conference in Villach concludes that increasing concentrations of greenhouse gases, if not mitigated, would lead in the first half of the 21 <sup>st</sup> century to a rise of global mean temperature greater than in any period of human history. <sup>13</sup>                                           |
| 1988  | Time-dependent (transient)                                                                                                                                                                                                                               |  |                                                                                                                                                                                                                                                                                                                       |

|      |                                                                                                                                                                                                                                                                                                                         |                                                                                                                                         |                                                                                                                                            |
|------|-------------------------------------------------------------------------------------------------------------------------------------------------------------------------------------------------------------------------------------------------------------------------------------------------------------------------|-----------------------------------------------------------------------------------------------------------------------------------------|--------------------------------------------------------------------------------------------------------------------------------------------|
|      | GCM simulations of climate response to three alternative scenarios of atmospheric concentrations conclude that the signal of anthropogenic climate warming would soon emerge from the noise of natural variability. <sup>14</sup>                                                                                       |                                                                                                                                         |                                                                                                                                            |
| 1988 |                                                                                                                                                                                                                                                                                                                         |                                                                                                                                         | Intergovernmental Panel on Climate Change (IPCC) is established.                                                                           |
| 1990 | First IPCC scenarios (SA90) published describing four possible futures with assumptions ranging from high economic growth and fossil fuel use with high emissions to an accelerated policy scenario with low emissions. <sup>15</sup>                                                                                   | IPCC First Assessment Report released: The Report's impact assessment uses analogue climates and equilibrium climate model experiments. | Second World Climate Conference calls for establishment of an international climate change convention and Global Climate Observing System. |
| 1991 |                                                                                                                                                                                                                                                                                                                         | Impact studies published <sup>16</sup> based on the transient climate scenarios of ref 14.                                              |                                                                                                                                            |
| 1992 | IPCC publishes six new scenarios (IS92) reflecting new developments such as the London Amendments to the Montreal Protocol, new population scenarios, and updates on tropical deforestation. The scenarios span a wide range of "business as usual" assumptions (i.e., in the absence of climate policy). <sup>17</sup> |                                                                                                                                         |                                                                                                                                            |
| 1994 | An IPCC approved evaluation of IS92 recommends an open scenario process using multiple models, incorporation of economic restructuring in Eastern Europe and the former Soviet Union, and exploration of alternative economic development pathways. <sup>18</sup>                                                       | IPCC approves technical guidelines for impact assessment including information on applying scenarios. <sup>19</sup>                     |                                                                                                                                            |
| 1995 |                                                                                                                                                                                                                                                                                                                         | Intercomparison of                                                                                                                      |                                                                                                                                            |

|      |                                                                                                                                                                                                                          |                                                                                                                                                                                                     |                                                                                                                                                                                           |
|------|--------------------------------------------------------------------------------------------------------------------------------------------------------------------------------------------------------------------------|-----------------------------------------------------------------------------------------------------------------------------------------------------------------------------------------------------|-------------------------------------------------------------------------------------------------------------------------------------------------------------------------------------------|
|      |                                                                                                                                                                                                                          | global vegetation model results using equilibrium GCM 2xCO <sub>2</sub> scenarios is published. <sup>20</sup>                                                                                       |                                                                                                                                                                                           |
| 1995 | MAGICC/SCENGEN (SCENario GENerator) software allows non-specialists to make use of climate scenarios. <sup>21</sup>                                                                                                      | IPCC Second Assessment Report impact volume relies primarily on equilibrium climate experiments, with some studies based on transient climate model runs.                                           |                                                                                                                                                                                           |
| 1996 |                                                                                                                                                                                                                          | Programs of country studies on impacts, adaptation and vulnerability conducted worldwide. <sup>22</sup>                                                                                             |                                                                                                                                                                                           |
| 1998 |                                                                                                                                                                                                                          |                                                                                                                                                                                                     | IPCC Data Distribution Centre ( <a href="http://www.ipcc-data.org/">http://www.ipcc-data.org/</a> ) established to increase availability of climate scenarios for use in impact research. |
| 1998 | Database and review of more than 400 scenarios of global and regional greenhouse gas emissions and their main driving forces - population, economy, energy intensity, and carbon intensity – is published. <sup>23</sup> | IPCC's first regional assessment of impact, adaptation, and vulnerability published, includes regional socio-economic baselines, and assesses impact results based on IS92 scenarios. <sup>24</sup> |                                                                                                                                                                                           |
| 1999 | IPCC approves "Special Report on Emissions Scenarios" developed through an open process using multiple integrated assessment models. Scenarios are based on a combined approach using                                    |                                                                                                                                                                                                     |                                                                                                                                                                                           |

|      |                                                                                                                                                                                                                                                                                 |                                                                                                                                                                                                                               |  |
|------|---------------------------------------------------------------------------------------------------------------------------------------------------------------------------------------------------------------------------------------------------------------------------------|-------------------------------------------------------------------------------------------------------------------------------------------------------------------------------------------------------------------------------|--|
|      | qualitative narratives and quantitative projections to explore the range of GHG emissions in the absence of explicit climate policies. <sup>25</sup>                                                                                                                            |                                                                                                                                                                                                                               |  |
| 2000 | Climate scenarios based on GCM projections for IS92 emissions are pattern-scaled to represent climates under SRES emissions to assist in interpreting impacts based on earlier IS92 projections and in anticipation of new SRES-forced climate model simulations. <sup>26</sup> |                                                                                                                                                                                                                               |  |
| 2001 | Comprehensive multi-model assessment of SRES-based mitigation pathways to stabilize CO <sub>2</sub> concentrations. <sup>27</sup>                                                                                                                                               | IPCC Third Assessment Report released: most impact results assessed in the report are based on IS92 scenarios.                                                                                                                |  |
| 2001 |                                                                                                                                                                                                                                                                                 | A socio-economic scenario framework for vulnerability assessment based on SRES is developed by the United Kingdom Climate Impacts Programme for use in regional and national climate impact assessment studies. <sup>28</sup> |  |
| 2004 | GCM-based regional projections of seasonal temperature and precipitation changes based on SRES forcing provided to authors of the IPCC Fourth Assessment Report. <sup>29</sup>                                                                                                  |                                                                                                                                                                                                                               |  |
| 2005 | Emissions scenarios start to cover mitigation options for non-CO <sub>2</sub> GHGs. <sup>30</sup>                                                                                                                                                                               | Scenarios from the Millennium Ecosystem Assessment                                                                                                                                                                            |  |

|      |                                                                                                                                                                                                                                                  |                                                                                                                                                                                                                  |                                                                                                                                                                                                                                                      |
|------|--------------------------------------------------------------------------------------------------------------------------------------------------------------------------------------------------------------------------------------------------|------------------------------------------------------------------------------------------------------------------------------------------------------------------------------------------------------------------|------------------------------------------------------------------------------------------------------------------------------------------------------------------------------------------------------------------------------------------------------|
|      |                                                                                                                                                                                                                                                  | explore implications of climate change for ecosystems, land-cover changes and human well-being. <sup>31</sup>                                                                                                    |                                                                                                                                                                                                                                                      |
| 2006 |                                                                                                                                                                                                                                                  |                                                                                                                                                                                                                  | Aspen Global Change Institute workshop initiates planning for new scenario process. <sup>32</sup>                                                                                                                                                    |
| 2007 | IPCC expert meeting discusses plans for research community to develop new scenarios and options for "representative concentration pathways" to span the full range of business as usual and climate policy scenarios. <sup>33</sup>              | IPCC Fourth Assessment Report released. WG I (physical science basis) evaluates new model results and WG II (impacts, adaptation, and vulnerability) assesses research based on earlier SRES and IS92 scenarios. | The Integrated Assessment Modeling Consortium (IAMC) is established to foster integrated assessment research, coordinate with the climate modeling and impact research communities, and serve as a point of contact with users of scenario research. |
| 2007 | An assessment published by the US Climate Change Science Program explores how four different radiative forcing stabilization pathways can be achieved by a diverse range of socioeconomic and technological development scenarios. <sup>34</sup> |                                                                                                                                                                                                                  |                                                                                                                                                                                                                                                      |

|      |                                                                                                                                                                                                                                                                             |  |                                                                                                                                 |
|------|-----------------------------------------------------------------------------------------------------------------------------------------------------------------------------------------------------------------------------------------------------------------------------|--|---------------------------------------------------------------------------------------------------------------------------------|
| 2009 | The IAMC releases the Representative Concentration Pathways (RCPs) to the climate modeling community starting the “parallel phase” of new scenario process. Database at <a href="http://www.iiasa.ac.at/web-apps/tnt/RcpDb">http://www.iiasa.ac.at/web-apps/tnt/RcpDb</a> . |  | World Climate Conference 3 discusses development of capacity to respond to the needs of users of climate information worldwide. |
| 2009 | The United Kingdom releases national probabilistic climate projections (UKCP09). Regional climate projections are expressed in terms of likelihood rather than as scenarios. <sup>35</sup>                                                                                  |  |                                                                                                                                 |

|      |                                                                                                                                                                                      |  |  |
|------|--------------------------------------------------------------------------------------------------------------------------------------------------------------------------------------|--|--|
| 2009 | Probabilistic methodology refined and extended by in ENSEMBLES project, which also includes new "peak and decline" stabilisation simulations with Earth System Models. <sup>36</sup> |  |  |
|------|--------------------------------------------------------------------------------------------------------------------------------------------------------------------------------------|--|--|

### References:

1. Arrhenius, S. On the influence of carbonic acid in the air upon the temperature of the ground. Lond. Edinb. Dublin Phil. Mag. J. Sci. (5th ser.) **41**, 237–275 (1896).
2. Keeling, C. D. The concentration and isotopic abundance of carbon dioxide in the atmosphere. *Tellus* **12**, 200–203 (1960).
3. Manabe, S. & Wetherald, R. T. Thermal equilibrium of the atmosphere with a given distribution of relative humidity. *J. Atmos. Sci.* **24**, 241–259 (1967).
4. Manabe, S. et al. A global ocean-atmosphere climate model: Part I. The atmospheric circulation. *J. Phys. Oceanogr.* **5**, 3–29 (1975).
5. Meadows, D. et al. *The Limits to Growth* (Universe Books, 1972).
6. Leontief, W. *The Future of the World Economy: A Study on the Impact of Prospective Economic Issues and Policies on the International Development Strategy* (United Nations, New York, 1976).
7. Herrera, A. et al. *Catastrophe or New Society? A Latin American World Model* (IDRC, Ottawa, 1976).
8. Mesarovic, M. & Pestel, E. *Mankind at the Turning Point* (Dutton, 1974).
9. Häfele, W., Anderer, J., McDonald, A. & Nakicenovic, N. *Energy in a Finite World: Paths to a Sustainable Future* (Ballinger, 1981).
10. Robertson, J. *The Sane Alternative – A Choice of Futures* (River Basin, 1983).



11. Svedin, U. & Aniansson, B. Surprising Futures: Notes From an International Workshop on Long-term World Development (Swedish Council for Planning and Coordination of Research, Stockholm, 1987).
12. WMO/UNEP/ICSU. Report of the Study Conference on Sensitivity of Ecosystems and Society to Climate Change (WCP-83, UNESCO, Geneva, 1984).
13. WMO/UNEP/ICSU. Report of the International Conference on the Assessment of the Role of Carbon Dioxide and of other Greenhouse Gases in Climate Variations and Associated Impacts (WMO No. 661, UNESCO, Geneva, 1986).
14. Hansen, J. et al. Global climate changes as forecast by Goddard Institute for Space Studies three-dimensional model. *J. Geophys. Res.* **93**, 9341–9364 (1988).
15. Response Strategies Working Group. in *Climate Change: The IPCC Scientific Assessment* (eds Houghton, J. T., Jenkins, G. J. & Ephraums J. J.) 329–341 (Cambridge Univ. Press, 1990).
16. Carter, T. R., Parry, M. L. & Porter, J. H. Climatic change and future agroclimatic potential in Europe. *Int. J. Climatol.* **11**, 251–269 (1991).
17. Leggett, J., Pepper, W. J. & Swart, R. J. in *Climate Change 1992: The Supplementary Report to the IPCC Scientific Assessment* (eds Houghton, J. T., Callander, B. A. & Varney, S. K.) 69–95 (Cambridge Univ. Press, 1992).
18. Alcamo, J. *et al.* An evaluation of the IPCC IS92 emission scenarios. In *Climate Change 1994: Radiative Forcing of Climate Change and an Evaluation of the IPCC IS92 Emission Scenarios*. 247–304. Cambridge University Press, London (1995)
19. Carter, T. R., Parry, M. L., Harasawa, H. & Nishioka, S. (eds) *IPCC Technical Guidelines for Assessing Climate Change Impacts and Adaptations* (Dept of Geography, University College London, UK, and Center for Global Environmental Research, National Institute for Environmental Studies, Tsukuba, Japan, 1994).
20. Melillo, J. M. et al. Vegetation/Ecosystem Modeling and Analysis Project (VEMAP): comparing biogeography and biogeochemistry models in a continental-scale study of terrestrial ecosystem responses to climate change and CO<sub>2</sub> doubling. *Glob. Biogeochem. Cycles* **9**, 407–437 (1995).
21. Hulme, M., Raper, S. C. B. & Wigley, T.M. L. An integrated framework to address climate change (ESCAPE) and further developments of the global and regional climate modules (MAGICC). *Energy Policy* **23**, 347–355 (1995).
22. Smith, J. B., et al. *Vulnerability and Adaptation to Climate Change. Interim Results from the U.S. Country Studies Program* (Kluwer Academic, 1996).

23. Nakicenovic, N., Victor, N. & Morita, T. Emissions scenarios database and review of scenarios. *Mitig. Adapt. Strategies Glob. Change* **3**, 95–120 (1998).
24. Watson, R. T., Zinyowera, M. C. & Moss, R. H. (eds) *The Regional Impacts of Climate Change: An Assessment of Vulnerability* (Cambridge Univ. Press, 1998).
25. Nakićenović, N. et al. *Special Report on Emissions Scenarios: A Special Report of Working Group III of the Intergovernmental Panel on Climate Change* (Cambridge Univ. Press, 2000).
26. Carter, T. R. et al. *Climate Change in the 21st Century – Interim Characterizations Based on the New IPCC Emissions Scenarios* (The Finnish Environment 433, Finnish Environment Institute, Helsinki, 2000).
27. Morita, T. *et al.* *Greenhouse Gas Emission Mitigation Scenarios and Implications. In Climate Change 2001: Mitigation, Third Assessment Report. Working Group III of the Intergovernmental Panel on Climate Change, Geneva, Switzerland. (2001)*
28. United Kingdom Climate Impacts Programme. *Socio-economic Scenarios for Climate Change Impact Assessment: A Guide to Their Use in the UK Climate Impacts Programme* (United Kingdom Climate Impacts Programme, Oxford, 2001).
29. Ruosteenoja, K., Carter, T. R., Jylhä, K. & Tuomenvirta, H. *Future Climate in World Regions: An Intercomparison of Model-based Projections for the New IPCC Emissions Scenarios* (The Finnish Environment 644, Finnish Environment Institute, Helsinki, 2003).
30. Weyant, J. P., De La Chesnaye, C. F. & Blanford, J. Overview of EMF21: multigreenhouse gas mitigation and climate policy. *Energy J.* **27** (Special Issue), 1–33 (2006).
31. Millennium Ecosystem Assessment. *Ecosystems and Human Well-being: Scenarios, Vol. 2* (eds Carpenter, S. R. et al.) xix–551 (Island Press, 2005).
32. Hibbard, K. A., Meehl, G. A., Cox, P. & Friedlingstein, P. A strategy for climate change stabilization experiments. *Eos* **88**, 217, 219, 221 (2007).
33. Moss, R. H. et al. *Towards New Scenarios for Analysis of Emissions, Climate Change, Impacts, and Response Strategies* (IPCCExpertMeeting Report, IPCC, Geneva, 2008).
34. Clarke, L. et al. *Scenarios of Greenhouse Gas Emissions and Atmospheric Concentrations* (Sub-report 2.1A of Synthesis and Assessment Product 2.1, US Climate Change Science Program and the Subcommittee on Global Change Research, Department of Energy, Office of Biological & Environmental Research, Washington DC, 2007).

35. Murphy, J. M. et al. UK Climate Projections Science Report: Climate Change Projections (Met Office Hadley Centre, Exeter, UK, 2009).
36. van der Linden, P. & Mitchell, J. F. B. (eds) ENSEMBLES: Climate Change and its Impacts: Summary of research and results from the ENSEMBLES project (Met Office Hadley Centre, Exeter, UK, 2009).
